# Supplementary material for: Highly ordered, polypyrrole-coated Co(OH)2architectures for high-performance asymmetric supercapacitors
Source: Royal Society of Chemistry journal article supplement (doi:10.1039/c6ta01419d), 2016-01-01
Supplement: c6ta01419d1.pdf [file c6ta01419d1.pdf]

Electronic Supplementary Information (ESI) for

## **Highly-Ordered Polypyrrole Coated Co(OH)<sub>2</sub> Architectures for High-Performance Asymmetric Supercapacitors**

Jun Seop Lee <sup>a,b</sup> <sup>‡</sup>, Dong Hoon Shin <sup>a</sup> <sup>‡</sup>, Wooyoung Kim <sup>a</sup>, and Jyongsik Jang <sup>a\*</sup>

<sup>a</sup> *School of Chemical and Biological Engineering, College of Engineering, Seoul National University (SNU), 599 Gwanangno, Gwanak-gu, Seoul, 151-742 (Korea). Fax: +82-2-888-7295; Tel: 82-2-880-8348; \*e-mail: [jsjang@plaza.snu.ac.kr](mailto:jsjang@plaza.snu.ac.kr)*

<sup>b</sup> *Materials Science and Engineering Program and Texas Materials Institute, The University of Texas at Austin, Austin, TX 78712, (USA)*

<sup>‡</sup> These authors contributed equally to this work.

## 1. SAED pattern of $\text{Co}(\text{OH})_2$

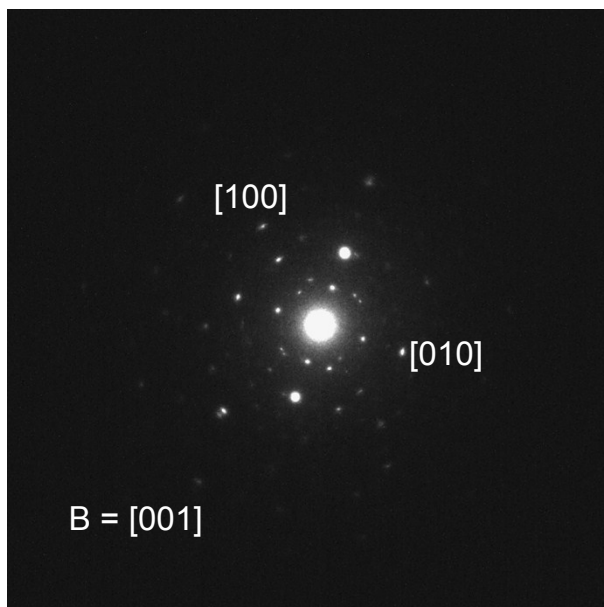

**Figure S1.** Selected area electron diffraction (SAED) pattern of  $\text{Co}(\text{OH})_2$ NSs.

## 2. XRD spectrum of the $\text{Co}(\text{OH})_2$ architectures

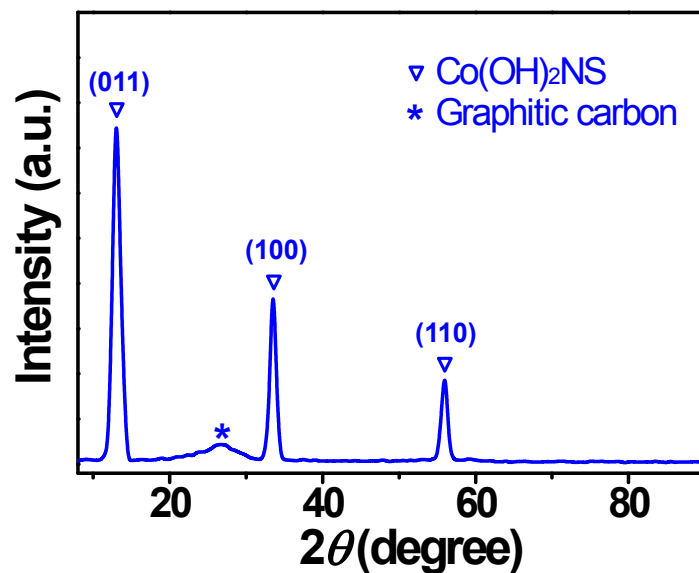

**Figure S2.** X-ray diffraction (XRD) pattern of  $\text{Co}(\text{OH})_2$  architectures and pristine carbon cloth (black: pristine carbon cloth; red:  $\text{Co}(\text{OH})_2\text{MP}$ ; blue:  $\text{Co}(\text{OH})_2\text{MF}$ ; green:  $\text{Co}(\text{OH})_2\text{NS}$ ).

### 3. Gravimetric capacitance of each electrode

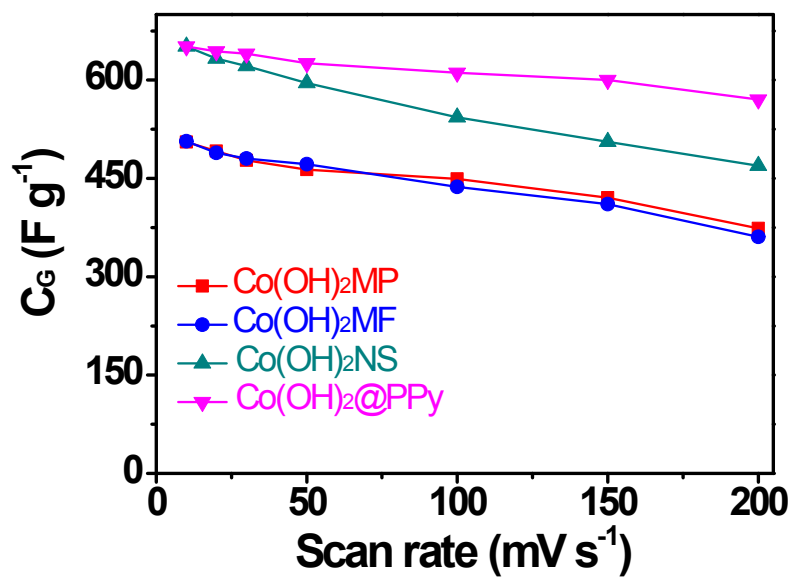

**Figure S3.** Calculated gravimetric capacitance ( $F g^{-1}$ ) of each electrode for various scan rates (10 to 200  $mV s^{-1}$ ).

#### 4. Structure of the ASCs

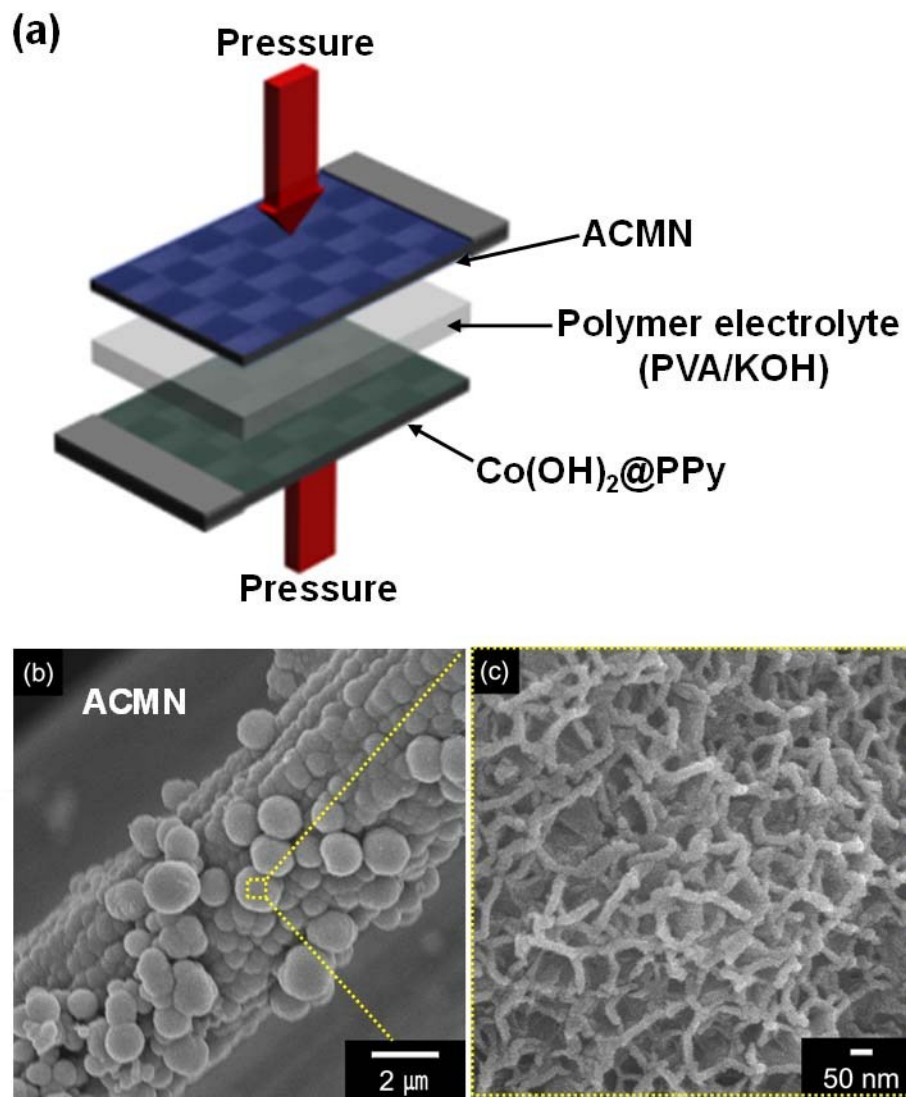

**Figure S4.** (a) Schematic diagram of asymmetric supercapacitors (ASCs) composed of two different electrodes ( $\text{Co(OH)}_2\text{@PPy}$ : positive; CNTMN: negative) and polymer-gel electrolyte. (b) Low- and (c) high-magnification of FE-SEM images of the CNTMN decorated carbon cloth.

## 5. Deformations of the ASCs

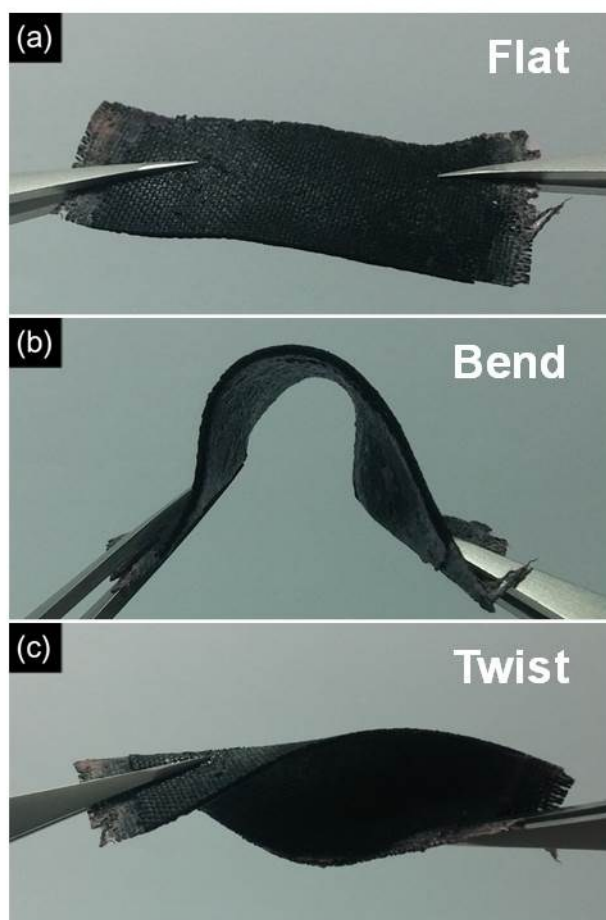

**Figure S5.** Digital photographs of (a) flat-, (b) bended-, and (c) twisted-ASCs.

## 6. Volumetric and gravimetric capacitance of the ASCs

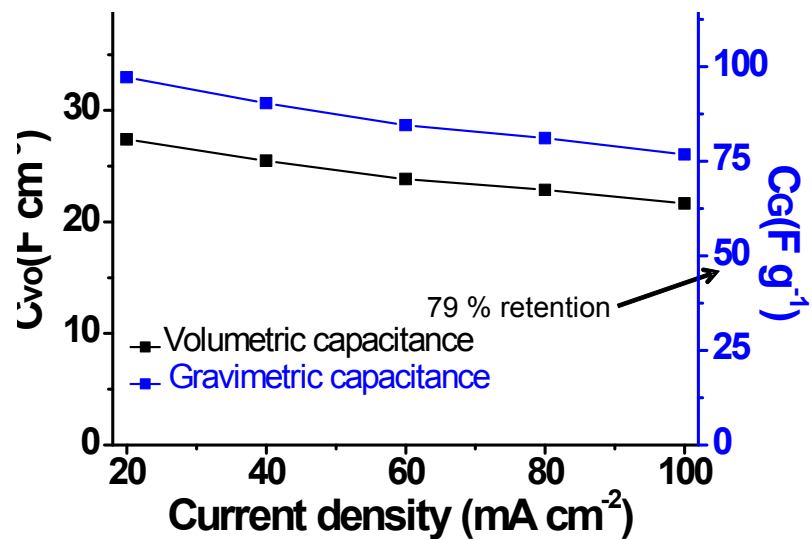

**Figure S6.** Volumetric (left) and gravimetric (right) capacitances of the ASCs calculated from the galvanostatic charge-discharge curves as a function of current density.

## 7. Real application of the ASCs

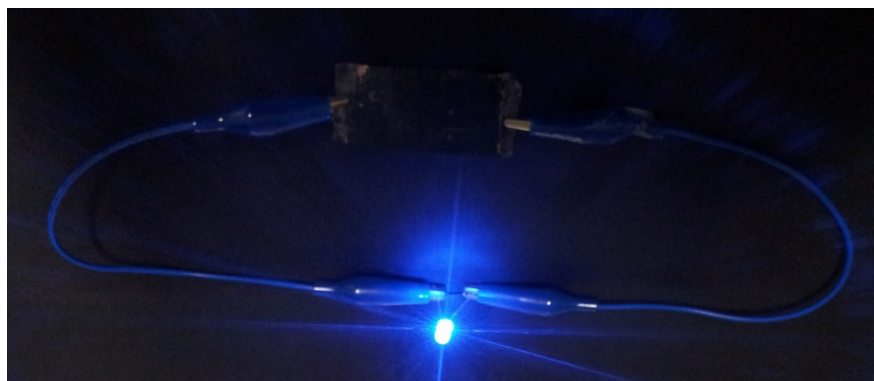

**Figure S7.** Blue light-emitting diode (LED) powered by the fabricated ASC.



## 8. CV curves of the ASCs with deformations

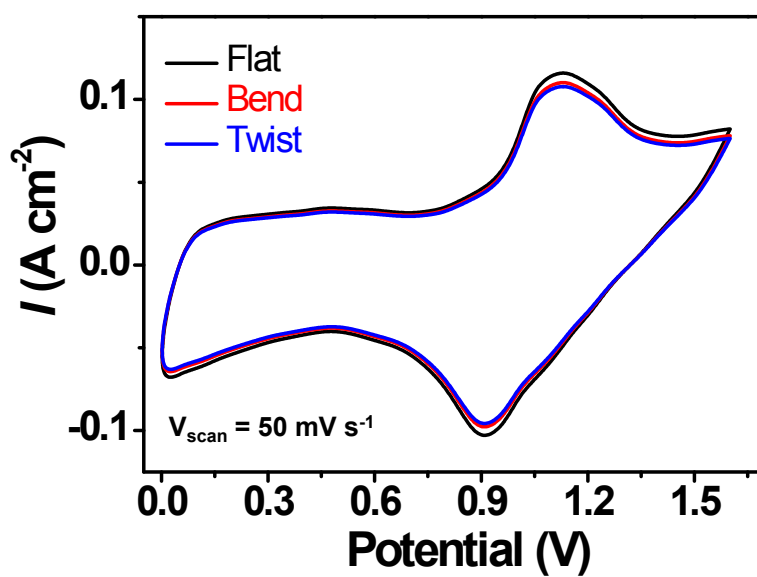

**Figure S8.** CV curves (scan rate:  $50 \text{ mV s}^{-1}$ ) of ASCs for various deformations (black: flat; red: bend; blue: twist).
